**Correlates of resting and exertional dyspnea among older adults with obstructive lung disease: a cross-sectional analysis of the Canadian Longitudinal Study on Aging**

Joshua Good, M.HSc (1), Michael K Stickland, PhD (2), Shilpa Dogra, PhD (1).

1. Faculty of Health Sciences (Kinesiology), University of Ontario Institute of Technology, Oshawa, Ontario.
2. Faculty of Medicine and Dentistry, University of Alberta, and G.F. Macdonald Centre for Lung Health, Edmonton, Alberta

Corresponding Author: Dr. Shilpa Dogra; [Shilpa.Dogra@uoit.ca](mailto:Shilpa.Dogra@uoit.ca); Faculty of Health Sciences (Kinesiology), University of Ontario Institute of Technology, 2000 Simcoe St N, Oshawa, ON. L1H-7K4; 1-905-721-8668 ext. 6240

Article Type: New Results

Word count for abstract: 250

Word count for main text: 3352

Number of Tables: 1

Number of Figures: 2

1 *Introduction:* In patients with chronic obstructive pulmonary disease (COPD), the perception of  
2 dyspnea is related to quality of life, and is a better predictor of mortality than the severity of  
3 airway obstruction. The purpose of the current study was to use population-level data from the  
4 Canadian Longitudinal Study on Aging (CLSA) to identify potential correlates of dyspnea in  
5 adults with obstructive lung disease.

6 *Methods:* Data from participants with a self-reported obstructive lung disease (asthma or COPD)  
7 were used for analysis (n=2,854). Four outcome variables were assessed: self-reported dyspnea  
8 at 1) rest, 2) walking on a flat surface, 3) walking uphill/climbing stairs, 4) following strenuous  
9 activity. Potential sociodemographic, health, and health behaviour correlates were entered in to  
10 logistic regression models.

11 *Results:* Higher body fat percentage, and worse forced expiratory volume in one second were  
12 associated with higher odds of reporting dyspnea. Females with an anxiety disorder (OR=1.91,  
13 CI: 1.29, 2.83) and males with a mood disorder (OR=2.67, CI: 1.53, 4.68) reported higher odds  
14 of experiencing dyspnea walking on a flat surface, independent of lung function and other  
15 correlates. Dyspnea while walking uphill/climbing stairs was associated with a slower timed up  
16 and go time in females (e.g. OR=1.18, CI: 1.10) and males (OR=1.19, CI: 1.09, 1.30).

17 *Conclusions:* In addition to traditional predictors such as lung function and body composition,  
18 we found that anxiety and mood disorders, as well as functional fitness were correlates of  
19 dyspnea. Further research is needed to understand whether targeting these correlates leads to  
20 improvements in perceptions of dyspnea.

21 **Keywords:** Dyspnea, COPD, Asthma, Correlation studies

22

## 23 INTRODUCTION

24 Dyspnea, or perceived breathlessness, is a symptom commonly reported by individuals with  
25 obstructive lung diseases such as asthma and chronic obstructive lung disease (COPD) <sup>1,2</sup>. The  
26 prevalence of dyspnea ranges from 9% in the general population <sup>3</sup> to approximately 50% in  
27 individuals with COPD <sup>4-7</sup>. These estimates may be low, as dyspnea is often underreported or not  
28 recognized by clinicians <sup>8</sup>. Dyspnea is related to a number of outcomes, including general health  
29 <sup>9</sup>, health related quality of life <sup>10,11</sup>, hospital admissions, and mortality <sup>12</sup> among individuals with  
30 COPD and asthma. In fact in patients with COPD, dyspnea has been shown to be a better  
31 predictor of mortality than airway obstruction as measured by the percentage of predicted forced  
32 expiratory volume in one second (FEV<sub>1</sub>) <sup>13</sup>. In other words, the severity of breathlessness cannot  
33 simply be predicted by disease severity or lung function measures. Research indicates that the  
34 improvement in dyspnea from participation in pulmonary rehabilitation occurs despite a lack of  
35 concurrent improvements in FEV<sub>1</sub> <sup>14</sup>. This association between dyspnea and physical inactivity is  
36 well-established, such that lower physical activity levels are related to worse dyspnea <sup>15,16</sup>.

37 Several other factors may influence perceptions of dyspnea. Recently, Ekström et al.  
38 found that female sex, smoking, presence of asthma, and chronic bronchitis were correlates of  
39 dyspnea in healthy adults <sup>3</sup>. FEV<sub>1</sub>, body mass index, anxiety, and depression have also been  
40 identified as correlates of resting dyspnea in adults with asthma or COPD <sup>17-19</sup>. Psychological  
41 factors such as mood or anxiety disorders may have particular significance given their increased  
42 prevalence among adults with COPD <sup>20</sup>. However, limited work has been done at the population-  
43 level to identify potential predictors of resting and exertional dyspnea among individuals with an  
44 existing obstructive lung disease. This is critical, as simple interventions targeting dyspnea may  
45 have a significant impact on the quality of life of individuals with obstructive lung diseases.

46 Thus, the purpose of this study was to use population-level data from the Canadian Longitudinal  
47 Study on Aging (CLSA) to identify potential correlates of resting and exertional dyspnea. Given  
48 that perceived dyspnea is known to differ by sex, analyses were conducted separately for males  
49 and females.

## 50 **METHODS**

51 **Data Source and Participants:** The CLSA is a nationally representative, stratified, random  
52 sample of 51,338 Canadian females and males aged 45 to 85 years (at baseline). The purpose of  
53 this survey is to collect data on the health and quality of life of Canadians to better understand  
54 the processes and dimensions of aging. Data for the present study are from participants  
55 (n=30,097) in the Comprehensive sample which collected data through questionnaires, physical  
56 examinations, and biological samples.

57 Inclusion in the CLSA was limited to those who were able to read and speak either  
58 French or English. Residents in the three territories and some remote regions, persons living on  
59 federal First Nations reserves and other First Nations settlements in the provinces, and full-time  
60 members of the Canadian Armed Forces were excluded. Individuals living in long-term care  
61 institutions (i.e., those providing 24-hour nursing care) were excluded at baseline; however,  
62 those living in households and transitional housing arrangements (e.g., seniors' residences, in  
63 which only minimal care is provided) were included. Finally, those with a cognitive impairment  
64 at the time of recruitment were excluded.

65 Only those with complete data for dyspnea outcomes (n=29,670), sociodemographic  
66 variables, selected health conditions, and physical activity (n=18,232) were included in the  
67 analysis. Only those who had self reported asthma and/or COPD, and did not report lung cancer

68 were included (n=2,854). Of these, 2,064 had asthma only, 514 had COPD only, and 276 had  
69 both asthma and COPD.

70 Self reported COPD and asthma were determined based on the questions “Has a doctor  
71 told you that you have/had any of the following: emphysema, chronic bronchitis, chronic  
72 obstructive pulmonary disease (COPD), or chronic changes in lungs due to smoking?” and “Has  
73 a doctor ever told you that you have asthma?”. Self report was used rather than spirometry to  
74 classify COPD because 24% of participants with self-reported COPD had taken short and/or long  
75 acting bronchodilators prior to spirometry.

## 76 **Measures**

### 77 *Dyspnea Variables*

78 Participants were asked the following four questions relating to resting and exertional dyspnea:  
79 “Do you become short of breath walking on flat surfaces?”, “Do you become short of breath  
80 climbing stairs or walking up a small hill?”, “Have you had an attack of shortness of breath that  
81 came on following strenuous activity at any time within the last 12 months?”, and “Have you had  
82 an attack of shortness of breath that came on during the day when you were at rest at any time  
83 within the last 12 months?”. Response options to each question were “Yes” or “No”. Each  
84 dichotomous variable was treated as an outcome in our analyses.

### 85 *Health and Health Behaviour Variables*

86 *Chronic Conditions:* Participants were asked to report chronic conditions that had been  
87 diagnosed by a physician and that were expected to last, or had already lasted, 6 months or more.  
88 We chose to use variables pertaining to *anxiety disorder, mood disorder, and cardiovascular*  
89 *disease* due to their known associations with breathlessness<sup>18, 19, 21</sup>. *Anxiety disorder and mood*  
90 *disorder* were based on the questions “Has a doctor ever told you that you have an anxiety

91 disorder such as a phobia, obsessive-compulsive disorder or a panic disorder?” and “Has a doctor  
92 ever told you that you have a mood disorder such as depression (including manic depression),  
93 bipolar disorder, mania, or dysthymia?”. Participants were classified as having *cardiovascular*  
94 *disease* if they responded positively to either of the following two questions: “Has a doctor ever  
95 told you that you have heart disease (including congestive heart failure, or CHF)?” or “Has a  
96 doctor ever told you that you have peripheral vascular disease or poor circulation in your  
97 limbs?”.

98 *Physical Activity and Functional Fitness*: Participants completed a *timed up and go* (TUG)  
99 assessment which required them to stand up from a chair with arm rests, walk 3 metres, turn  
100 around, walk back, and sit down. The time for participants to complete the TUG was used as a  
101 global indicator of physical function. To better understand the impact of exertional dyspnea, we  
102 also used responses from the question “In the past 12 months, have you felt like you wanted to  
103 participate more in physical activities? If yes, what prevented you from doing physical  
104 activities/more physical activities?”. Three response options were selected for the current  
105 analysis: “*Injury/Illness*”, “*Health condition limitation*”, and “*Lack of energy*” due to their  
106 applicability to individuals with obstructive lung conditions.

107 *Others*: For *smoking history*, participants were categorized as Never smoked, <10 pack years, or  
108 10 packs years or more based on responses to questions pertaining to the number of cigarettes  
109 smoked per day and total years smoked (further detail provided elsewhere <sup>22</sup>).

110 *Height* was measured to the nearest 0.1 cm by trained professionals (Seca 213). *Body fat*  
111 *percentage* was measured using bioimpedance (Hologic Discovery A Dual Energy X-Ray  
112 Absorptiometry). Total body fat percentage was assessed with participants lying flat on their  
113 back with their arms at their side and feet pointed in.

114 A handheld spirometer was used (TruFlow Easy-On) to assess lung function. Only those  
115 with major contraindications did not perform the test<sup>23</sup>. Maximal inspiratory and expiratory  
116 maneuvers were performed to obtain FEV<sub>1</sub>. Further detail on the procedures can be found in the  
117 CLSA spirometry standard operating procedures<sup>23</sup>. Only those who were able to complete three  
118 acceptable maximal maneuvers were included; that is, the difference between the best two FEV<sub>1</sub>  
119 and Forced vital capacity values was within 150ml. Participants with extreme data outside of  
120 normal physiological limits were also excluded (i.e. FEV<sub>1</sub> >10 Litres). The best FEV<sub>1</sub> was used  
121 for analysis. Percent predicted FEV<sub>1</sub> was calculated based on age, height, ethnicity, and sex,  
122 using formulas developed by the Global Lung Function Initiative<sup>24</sup>. Absolute FEV<sub>1</sub> was used in  
123 analyses rather than percent predicted FEV<sub>1</sub> due to previous research indicating that absolute  
124 values of lung function explain differences in breathlessness<sup>25</sup>, and because age, sex, and height  
125 were already included in each logistic regression.

### 126 *Sociodemographic Variables*

127 Participants were asked to report their *age* and *sex*, and provided information on household  
128 income. For *household income*, responses were categorized as “Less than \$20,000”, “\$20,000 to  
129 \$49,999”, “\$50,000 to \$99,999”, “\$100,000 to \$149,999”, and “\$150,000 or more”.

### 130 **Statistical Analysis**

131 Means and frequencies were used to describe the sample. Odds ratios were calculated for each of  
132 the dyspnea outcomes (at rest, walking on a flat surface, climbing stairs or walking uphill, and  
133 following strenuous activity) using logistic regressions. Each of the health and health behaviour  
134 (anxiety disorder, mood disorder, heart disease, TUG time, injury/illness limiting PA, health  
135 condition limiting PA, lack of energy limiting PA, smoking history, height, body fat percentage,

136 and FEV<sub>1</sub>), and sociodemographic (age and household income) variables were included in the  
137 same models. Analyses were conducted separately for males and females<sup>3</sup>.

138 All analyses were performed using SPSS v.24. To ensure national representation and to  
139 compensate for under-represented groups, sampling weights were applied to regression models.  
140 Significance was set at p<0.05. Additional details on sampling, methods and weighting on the  
141 CLSA can be found in the protocol document<sup>26, 27</sup>.

## 142 **RESULTS**

143 The sample had a mean age of 61.3 ± 9.8 years and was 60.0% female. Females had a  
144 significantly higher body fat percentage, were shorter, had a lower FEV<sub>1</sub>, and a higher percent  
145 predicted FEV<sub>1</sub> (Table 1). More females also reported shortness of breath at rest, walking on flat  
146 surface, and walking uphill/climbing stairs than males. Additional sample characteristics can be  
147 found in Table 1.

148 For all logistical regressions, OR presented are from models where all variables were entered  
149 simultaneously, thus these findings are independent of lung function, height, age, and other  
150 correlates.

151 Significant associations in the sample of males are highlighted in Figure 1. Having a mood  
152 disorder was associated with higher odds of reporting dyspnea at rest, while walking on a flat  
153 surface, and following strenuous activity when compared to males without a mood disorder. A  
154 one litre higher FEV<sub>1</sub> was associated with approximately half the odds of reporting dyspnea for  
155 three of four dyspnea outcomes.

156 Significant associations in the sample of females are highlighted in Figure 2. Females with an  
157 anxiety disorder were more likely to report dyspnea while walking on a flat surface, and  
158 following strenuous exercise compared to those without an anxiety disorder. A slower TUG time



159 was also associated with higher odds of reporting dyspnea for all three exertional dyspnea  
160 outcomes.

## 161 **DISCUSSION**

162 Using data from the CLSA, we sought to identify correlates of resting and exertional dyspnea  
163 among middle-aged and older Canadian males and females with an obstructive lung disease. The  
164 three main findings of this study are 1) females with an anxiety disorder and males with a mood  
165 disorder have higher odds of reporting dyspnea, independent of lung function and other  
166 correlates, 2) functional fitness may be important for limiting dyspnea, as individuals,  
167 particularly females, with a slower TUG time were more likely to report dyspnea, 3) age, body  
168 fat percentage, and FEV<sub>1</sub> are important correlates of dyspnea among both males and females.  
169 These findings are the first to use population level data to identify potential correlates of dyspnea  
170 in adults with asthma and COPD, and have implications for future research and interventions  
171 targeting dyspnea.

### 172 *Health and Health Behaviours*

173 Chronic Conditions: With regards to the chronic condition variables assessed, we found that  
174 having a mood disorder, anxiety disorder, or cardiovascular disease was associated with a higher  
175 odds of reporting dyspnea, even after adjusting for the effects of lung function, body fat %, and  
176 other correlates.

177 Previous research on the association between dyspnea and anxiety or depressive  
178 symptoms is mixed among individuals with COPD. Most studies demonstrate an association<sup>18,</sup>  
179<sup>28, 29</sup>; however, some do not<sup>30</sup>. It has been suggested that the stress of having a chronic condition  
180 may be related to the increased likelihood of having an anxiety or mood disorder<sup>31</sup>. For anxiety  
181 disorders in particular, the hyperventilation model has been suggested, whereby anxiety results in

182 baseline hyperventilation, which when added to obstruction and hypocapnia can aggravate  
183 symptoms of dyspnea<sup>32</sup>. Patients with anxiety may also be more likely to misinterpret symptoms  
184 of mild dyspnea as more severe<sup>32</sup>. Further, highly anxiety sensitive individuals appear to be  
185 more sensitive to the anticipation of a hyperventilation procedure<sup>33</sup>. Therefore, the anticipation  
186 of dyspnea may lead to a greater perception of dyspnea among individuals with both anxiety and  
187 an obstructive lung disease.

188 We observed sex-differences in the associations with anxiety and mood disorders. The  
189 reason for these sex differences is unclear. It has been suggested that males and females with  
190 major depression present with different symptoms<sup>34</sup>. Females also have higher rates of both  
191 depression and anxiety<sup>35</sup>. The differences observed in the current study may relate to the  
192 subjective experience of how males and females experience dyspnea. Males with mood disorders  
193 may be more likely to experience dyspnea, whereas females may experience different symptoms.  
194 In our study, the prevalence of anxiety was similar between males and females, but mood  
195 disorders were more prevalent in females compared to males (26 vs. 17%). This may help to  
196 explain sex differences observed in mood disorder. Understanding these associations is critical,  
197 as depression and anxiety are often untreated in adults with COPD<sup>36</sup>. Thus, proper treatment of  
198 anxiety and mood disorders may be aid in improving sensations of dyspnea, and thus quality of  
199 life.

200 The presence of heart disease was associated with dyspnea in females, such that having  
201 heart disease was associated with higher odds of reporting dyspnea at rest and while walking  
202 uphill<sup>3</sup>. However, among males, only dyspnea at rest was associated with heart disease, and this  
203 association was in the opposite direction expected. It is possible that the variable we used was  
204 not appropriate as it included any heart disease, including congestive heart failure. Future

205 research using specific cardiovascular disease variables may help us understand the interactive  
206 effects of cardiopulmonary disease on dyspnea.

207 Physical Activity and Functional Fitness: Reporting factors (Injury/Illness, Health condition  
208 limitation, and Lack of energy) that limited participation in physical activity, or having a slower  
209 TUG time, were both associated with reporting dyspnea. Among males, reporting a lack of  
210 energy that prevented more participation in physical activity was associated with dyspnea while  
211 walking on a flat surface and while walking uphill/climbing stairs. This is not surprising, as  
212 fatigue, or lack of energy, is a common symptom among those with COPD, and has been shown  
213 to be correlated with dyspnea,<sup>37-39</sup>.

214 Among females, TUG time, injury/illness, and reporting a health limitation that prevented  
215 more participation in physical activity were the most consistently associated with resting and  
216 exertional dyspnea. TUG time may be an important modifiable correlate of dyspnea as the  
217 presence of dyspnea may lead to avoidance of physical activity, causing further deconditioning,  
218 and thus worsening of dyspnea. Self-reported functional fitness has been shown to be associated  
219 with dyspnea in adults with COPD<sup>37, 40 41</sup>. Pulmonary rehabilitation programs have also led to  
220 improvements in 6 minute walk distance, and dyspnea<sup>14, 42, 43</sup>. Thus, measures of functional  
221 fitness may be useful clinical tools for physicians to use to better understand dyspnea in their  
222 patients.

223 Others: Our finding that body fat percentage was associated with exertional dyspnea outcomes is  
224 consistent with previous literature that indicates that fat free mass index is correlated with  
225 dyspnea among COPD patients<sup>44</sup>, and that body mass index has is associated with dyspnea  
226 among adults 40 years and older<sup>3, 4, 45</sup>. It is important to note that higher levels of exertional  
227 dyspnea among individuals with more body fat may be related to reduced lung volumes and

228 greater work of breathing required<sup>45</sup>; however, body mass index is often lower in individuals  
229 with the most severe COPD, (GOLD stages 3 and 4)<sup>46</sup>. Clearly, body fat is not the only factor  
230 leading to an increased perception of dyspnea, but it may be a contributing factor.

231 An interesting sex-difference emerged on the association of FEV<sub>1</sub> and dyspnea outcomes.  
232 Dyspnea at rest was significantly associated with FEV<sub>1</sub> among females, but not among males.  
233 Females may be more prone to reporting dyspnea at rest than males due to smaller airways, and  
234 smaller lung volumes<sup>47,48</sup>. In fact, in our sample, only 71 of 1,139 males (6.2%) reported  
235 dyspnea at rest. For all exertional dyspnea outcomes, a lower FEV<sub>1</sub> was significantly associated  
236 with a higher odds of reporting dyspnea (after adjustment for age and height). FEV<sub>1</sub> has  
237 consistently been shown to be negatively associated with dyspnea among the general population  
238<sup>3,4</sup>, individuals with asthma<sup>11</sup>, and with severe COPD<sup>49</sup>. Despite these associations, the  
239 relevance of this is unclear as even in the absence of lung function improvements following  
240 pulmonary rehabilitation, improvements in dyspnea have been observed<sup>14</sup>.

#### 241 *Sociodemographic Correlates*

242 Our finding that older age was associated with lower dyspnea was of interest. Increasing age is  
243 associated with a decline in lung function<sup>24</sup> and some studies from the general population  
244 indicate that increasing age is associated with an increase in severity or prevalence of dyspnea<sup>6,</sup>  
245<sup>7</sup>. However, there is evidence to suggest that increasing age is associated with a decrease in the  
246 occurrence of dyspnea<sup>4</sup>. This supports the notion that individuals can become accustomed, and  
247 therefore desensitised to feelings of breathlessness. In fact, researchers have suggested a decrease  
248 in the perception of bronchoconstriction in response to methacholine in older adults with and  
249 without asthma<sup>50</sup>. Furthermore, it is possible that individuals with dyspnea are less likely to  
250 survive to old age, leaving an older population that is “healthier” and less likely to report

251 dyspnea (survivor bias)<sup>6</sup>. This emphasizes the importance of treating dyspnea seriously in  
252 individuals of all ages.

253 Our finding that household income was only significant for two of the dyspnea outcomes  
254 among females, and with none of the outcomes among males was somewhat surprising. Previous  
255 research indicates that higher household income and lower social disadvantage is associated with  
256 lower perceived dyspnea<sup>45, 51</sup>. However, these studies assessed dyspnea using the mMRC, and  
257 Bowden et al. used social disadvantage based on geographical area rather than household  
258 income. Importantly, socioeconomic status of the sample used for the current study was high,  
259 with 72.1% of participants reporting a household income greater than \$50,000. Thus, future  
260 research in a more diverse sample may be warranted.

### 261 ***Strengths and Limitations***

262 Strengths of this study include the large representative sample, and the objectively measured  
263 lung function and body composition measures. There are also a number of limitation to the  
264 present study. First, the questions related to dyspnea for the CLSA have not been used in other  
265 research studies so direct comparisons can not be performed. The CLSA has performed a  
266 validation study for the broader set of chronic airflow obstruction questions and spirometry,  
267 regarding the ability to detect asthma or COPD<sup>52</sup>. Second, while we did remove those with lung  
268 cancer, we did not adjust for additional chronic conditions. Thus, care should be taken when  
269 interpreting the findings, as other chronic conditions may impact perceptions of dyspnea. Third,  
270 participants in the present study had fairly mild obstruction ( $86.9 \pm 17.3$  and  $89.0 \pm 16.6$  percent  
271 of predicted FEV<sub>1</sub> for males and females, respectively), possibly due to the inclusion of  
272 individuals who may have well controlled asthma. However, this emphasizes that the perception  
273 of dyspnea in this sample was not only due to poor lung function. Finally, it is important to note

274 that data from the CLSA are cross-sectional, thus, reverse-causality cannot be ruled out at this  
275 time.

## 276 **CONCLUSION**

277 In conclusion, using data from a large Canadian sample of older adults with obstructive lung  
278 disease, we found that those with an anxiety or mood disorder, and those with lower functional  
279 fitness had higher odds of reporting dyspnea after adjusting for lung function and other important  
280 correlates. These findings have implications for clinical practice as they could aid in early  
281 identification of adults at increased risk of dyspnea and poor health outcomes. This study also  
282 provides a basis for future research exploring the role of functional fitness and physical activity  
283 in improving perceptions of dyspnea among those with existing obstructive lung disease.

## 284 **Acknowledgements**

285 The opinions expressed in this manuscript are the author's own and do not reflect the views of  
286 the Canadian Longitudinal Study on Aging.

287 This research was made possible using the data collected by the Canadian Longitudinal Study on  
288 Aging (CLSA). Funding for the CLSA is provided by the Government of Canada through the  
289 Canadian Institutes of Health Research (CIHR) under grant reference: LSA 9447 and the Canada  
290 Foundation for Innovation. This research has been conducted using the CLSA dataset Baseline  
291 Comprehensive version 3.1 and Maintaining Contact version MCQ v2.0, under Application  
292 Number 170315. The CLSA is led by Drs. Parminder Raina, Christina Wolfson, and Susan  
293 Kirkland.

294 This work was supported by the Canadian Institutes of Health Research [funding reference  
295 number 372547]. The funding body was not involved in the design of the study, collection,  
296 analysis, interpretation of data, and in writing the manuscript.

### 297 **Conflict of interests**

298 None declared

### 299 **REFERENCES**

- 300 1. Loughheed MD, O'Donnell DE. Dyspnea in asthma. In: Mahler D.A., O'Donnell D.E.,  
301 eds. *Dyspnea: mechanisms, measurement and management*. New York, NY: Marcel-Dekker.  
302 2005.
- 303 2. Mahler DA, Ward J, Waterman LA, et al. Patient-reported dyspnea in COPD reliability  
304 and association with stage of disease. *Chest*. 2009;136(6):1473-9.
- 305 3. Ekström M, Sundh J, Schiöler L, et al. Absolute lung size and the sex difference in  
306 breathlessness in the general population. *PLoS One*. 2018;13(1):e0190876.
- 307 4. Lopez Varela MV, Montes de Oca M, Halbert RJ, et al. Sex-related differences in COPD  
308 in five Latin American cities: the PLATINO study. *Eur Respir J*. 2010;36(5):1034-41.
- 309 5. Eagan T, Bakke P, Eide G, et al. Incidence of asthma and respiratory symptoms by sex,  
310 age and smoking in a community study. *Eur Respir J*. 2002;19(4):599-605.
- 311 6. Hardie JA, Vollmer WM, Buist AS, et al. Respiratory symptoms and obstructive  
312 pulmonary disease in a population aged over 70 years. *Respir Med*. 2005;99(2):186-95.
- 313 7. Grønseth R, Vollmer WM, Hardie JA, et al. Predictors of dyspnoea prevalence: results  
314 from the BOLD study. *Eur Respir J*. 2014;43(6):1610-20.

- 315 8. Ries AL. Impact of chronic obstructive pulmonary disease on quality of life: the role of  
316 dyspnea. *Am J Med.* 2006;119(10):12-20.
- 317 9. Mahler DA, Tomlinson D, Olmstead EM, et al. Changes in dyspnea, health status, and  
318 lung function in chronic airway disease. *Am J Respir Crit Care Med.* 1995;151(1):61-5.
- 319 10. Burgel P-R, Escamilla R, Perez T, et al. Impact of comorbidities on COPD-specific  
320 health-related quality of life. *Respir Med.* 2013;107(2):233-41.
- 321 11. Martínez-Moragón E, Perpiñá M, Belloch A, et al. Determinants of dyspnea in patients  
322 with different grades of stable asthma. *J Asthma.* 2003;40(4):375-82.
- 323 12. Ong K-C, Earnest A, Lu S-J. A multidimensional grading system (BODE index) as  
324 predictor of hospitalization for COPD. *Chest.* 2005;128(6):3810-6.
- 325 13. Nishimura K, Izumi T, Tsukino M, et al. Dyspnea is a better predictor of 5-year survival  
326 than airway obstruction in patients with COPD. *Chest.* 2002;121(5):1434-40.
- 327 14. Ries AL, Kaplan RM, Limberg TM, et al. Effects of pulmonary rehabilitation on  
328 physiologic and psychosocial outcomes in patients with chronic obstructive pulmonary disease.  
329 *Ann Intern Med.* 1995;122(11):823-32.
- 330 15. Watz H, Waschki B, Meyer T, et al. Physical activity in patients with COPD. *Eur Respir*  
331 *J.* 2009;33(2):262-72.
- 332 16. Ramon MA, Ter Riet G, Carsin A-E, et al. The dyspnoea–inactivity vicious circle in  
333 COPD: development and external validation of a conceptual model. *Eur Respir J.*  
334 2018;52(3):1800079.
- 335 17. Nowobilski R, Furgał M, Czyż P, et al. Psychopathology and personality factors modify  
336 the perception of dyspnea in asthmatics. *J Asthma.* 2007;44(3):203-7.



- 337 18. Chavannes NH, Huibers MJH, Schermer TRJ, et al. Associations of depressive symptoms  
338 with gender, body mass index and dyspnea in primary care COPD patients. *Fam Pract.*  
339 2005;22(6):604-7.
- 340 19. Di Marco F, Verga M, Reggente M, et al. Anxiety and depression in COPD patients: the  
341 roles of gender and disease severity. *Respir Med.* 2006;100(10):1767-74.
- 342 20. Kunik ME, Roundy K, Veazey C, et al. Surprisingly high prevalence of anxiety and  
343 depression in chronic breathing disorders. *Chest.* 2005;127(4):1205-11.
- 344 21. Bennett SJ, Cordes DK, Westmoreland G, et al. Self-care strategies for symptom  
345 management in patients with chronic heart failure. *Nurs Res.* 2000;49(3):139-45.
- 346 22. Dogra S, Good J, Buman MP, et al. Movement behaviours are associated with lung  
347 function in middle-aged and older adults: a cross-sectional analysis of the Canadian longitudinal  
348 study on aging. *BMC Public Health.* 2018;18(1):818.
- 349 23. Canadian Longitudinal Study on Aging. Spirometry Standard Operating Procedures.  
350 2014.
- 351 24. Quanjer PH, Stanojevic S, Cole TJ, et al. Multi-ethnic reference values for spirometry for  
352 the 3-95 year age range: the global lung function 2012 equations. *Eur Respir J.* 2012;40(6):1324-  
353 43.
- 354 25. Ekström M, Schiöler L, Grønseth R, et al. Absolute values of lung function explain the  
355 sex difference in breathlessness in the general population. *Eur Respir J.* 2017;49(5):1602047.
- 356 26. Canadian Longitudinal Study on Aging. Sampling and Computation of Response Rates  
357 and Sample Weights for the Tracking (Telephone Interview) Participants and Comprehensive  
358 Participants. 2011.

- 359 27. Raina PS, Wolfson C, Kirkland SA, et al. The Canadian longitudinal study on aging  
360 (CLSA). *Can J Aging*. 2009;28(3):221-9.
- 361 28. Borges-Santos E, Wada JT, da Silva CM, et al. Anxiety and depression are related to  
362 dyspnea and clinical control but not with thoracoabdominal mechanics in patients with COPD.  
363 *Respir Physiol Neurobiol*. 2015;210:1-6.
- 364 29. Janssens T, De Peuter S, Stans L, et al. Dyspnea perception in COPD: association  
365 between anxiety, dyspnea-related fear, and dyspnea in a pulmonary rehabilitation program.  
366 *Chest*. 2011;140(3):618-25.
- 367 30. Cleland JA, Lee AJ, Hall S. Associations of depression and anxiety with gender, age,  
368 health-related quality of life and symptoms in primary care COPD patients. *Fam Pract*.  
369 2007;24(3):217-23.
- 370 31. Mrazek DA. Psychiatric symptoms in patients with asthma: Causality, comorbidity, or  
371 shared genetic etiology. *Child Adolesc Psychiatr Clin N Am*. 2003;12(3):459-71.
- 372 32. Mikkelsen RL, Middelboe T, Pisinger C, et al. Anxiety and depression in patients with  
373 chronic obstructive pulmonary disease (COPD). A review. *Nord J Psychiat*. 2004;58(1):65-70.
- 374 33. Melzig CA, Michalowski JM, Holtz K, et al. Anticipation of interoceptive threat in  
375 highly anxiety sensitive persons. *Behav Res Ther*. 2008;46(10):1126-34.
- 376 34. Kockler M, Heun R. Gender differences of depressive symptoms in depressed and  
377 nondepressed elderly persons. *Int J Geriatr Psychiatry*. 2002;17(1):65-72.
- 378 35. Altemus M, Sarvaiya N, Epperson CN. Sex differences in anxiety and depression clinical  
379 perspectives. *Front Neuroendocrinol*. 2014;35(3):320-30.
- 380 36. Yohannes AM, Alexopoulos GS. Depression and anxiety in patients with COPD. *Eur*  
381 *Respir Rev*. 2014;23(133):345-9.

- 382 37. Reishtein JL. Relationship between symptoms and functional performance in COPD. Res  
383 Nurs Health. 2005;28(1):39-47.
- 384 38. Jablonski A, Gift A, Cook KE. Symptom assessment of patients with chronic obstructive  
385 pulmonary disease. West J Nurs Res. 2007;29(7):845-63.
- 386 39. Eckerblad J, Tödt K, Jakobsson P, et al. Symptom burden in stable COPD patients with  
387 moderate or severe airflow limitation. Heart Lung. 2014;43(4):351-7.
- 388 40. Siela D. Use of self-efficacy and dyspnea perceptions to predict functional performance  
389 in people with COPD. Rehabil Nurs. 2003;28(6):197-204.
- 390 41. Donesky-Cuenca D, Nguyen HQ, Paul S, et al. Yoga therapy decreases dyspnea-related  
391 distress and improves functional performance in people with chronic obstructive pulmonary  
392 disease: a pilot study. J Altern Complem Med. 2009;15(3):225-34.
- 393 42. Verrill D, Barton C, Beasley W, et al. The effects of short-term and long-term pulmonary  
394 rehabilitation on functional capacity, perceived dyspnea, and quality of life. Chest.  
395 2005;128(2):673-83.
- 396 43. Paz-Díaz H, De Oca MM, López JM, et al. Pulmonary rehabilitation improves  
397 depression, anxiety, dyspnea and health status in patients with COPD. Am J Phys Med Rehabil.  
398 2007;86(1):30-6.
- 399 44. Ischaki E, Papatheodorou G, Gaki E, et al. Body mass and fat-free mass indices in  
400 COPD: relation with variables expressing disease severity. Chest. 2007;132(1):164-9.
- 401 45. Bowden JA, To TH, Abernethy AP, et al. Predictors of chronic breathlessness: a large  
402 population study. BMC Public Health. 2011;11(1):33.

- 403 46. Steuten LM, Creutzberg EC, Vrijhoef HJ, et al. COPD as a multicomponent disease:  
404 inventory of dyspnoea, underweight, obesity and fat free mass depletion in primary care. *Prim*  
405 *Care Respir J.* 2006;15(2):84.
- 406 47. Sheel AW, Guenette JA. Mechanics of breathing during exercise in men and women: sex  
407 versus body size differences? *Exerc Sport Sci Rev.* 2008;36(3):128-34.
- 408 48. Sheel AW, Richards JC, Foster GE, et al. Sex differences in respiratory exercise  
409 physiology. *Sports Med.* 2004;34(9):567-79.
- 410 49. Redelmeier DA, Goldstein RS, Min ST, et al. Spirometry and dyspnea in patients with  
411 COPD: when small differences mean little. *Chest.* 1996;109(5):1163-8.
- 412 50. Connolly M, Crowley J, Charan N, et al. Reduced subjective awareness of  
413 bronchoconstriction provoked by methacholine in elderly asthmatic and normal subjects as  
414 measured on a simple awareness scale. *Thorax.* 1992;47(6):410-3.
- 415 51. Currow DC, Plummer JL, Crockett A, et al. A community population survey of  
416 prevalence and severity of dyspnea in adults. *J Pain Symptom Manage.* 2009;38(4):533-45.
- 417 52. Oremus M, Postuma R, Griffith L, et al. Validating Chronic Disease Ascertainment  
418 Algorithms for Use in the Canadian Longitudinal Study on Aging. *Can J Aging.* 2013;32(3):232-  
419 9.

420

421

| Characteristics                                                     |                        | Males (n=1,139) | Females (n=1,715) |
|---------------------------------------------------------------------|------------------------|-----------------|-------------------|
| Age (years)                                                         | N/A                    | 61.4 ± 9.9      | 61.2 ± 9.7        |
| Body fat percentage                                                 | N/A                    | 28.8 ± 5.8      | 40.2 ± 6.4*       |
| Height (cm)                                                         | N/A                    | 175.0 ± 6.8     | 161.6 ± 6.6*      |
| FEV <sub>1</sub> (L)                                                | N/A                    | 3.0 ± 0.7       | 2.2 ± 0.6*        |
| Percent predicted<br>FEV <sub>1</sub> (%)                           | N/A                    | 86.9 ± 17.3     | 89.0 ± 16.6*      |
| FEV <sub>1</sub> /FVC                                               | N/A                    | 73.1 ± 8.3      | 74.8 ± 7.0*       |
| Percent below lower<br>limit of normal for<br>FEV <sub>1</sub> /FVC | N/A                    | 14.8%           | 9.3%              |
| Household income<br>(% of sample)^                                  | Less than \$20,000     | 3.9%            | 7.1%              |
|                                                                     | \$20,000 to \$49,999   | 16.0%           | 26.1%             |
|                                                                     | \$50,000 to \$99,999   | 33.5%           | 34.9%             |
|                                                                     | \$100,000 to \$149,999 | 24.3%           | 16.6%             |
|                                                                     | \$150,000 or more      | 22.3%           | 15.4%             |
| Smoking history                                                     | Never smoked           | 41.6%           | 43.9%             |
|                                                                     | <10 Pack Years         | 23.8%           | 25.5%             |
|                                                                     | 10 or more Pack Years  | 34.6%           | 30.6%             |
| Anxiety disorder (%<br>yes)^                                        | N/A                    | 9.1%            | 12.9%             |

|                                                                            |                                    |           |           |
|----------------------------------------------------------------------------|------------------------------------|-----------|-----------|
| Mood disorder (%<br>yes)^                                                  | N/A                                | 17.4%     | 26.1%     |
| Heart disease (%<br>yes)                                                   | N/A                                | 16.6%     | 13.9%     |
| Timed up and go<br>(seconds to<br>complete)                                | N/A                                | 9.4 ± 2.0 | 9.5 ± 2.6 |
| Factor preventing<br>more participation in<br>physical activity (%<br>yes) | Injury/Illness^                    | 9.8%      | 12.5%     |
|                                                                            | Health condition<br>limitation^    | 11.7%     | 14.6%     |
|                                                                            | Lack of energy^                    | 4.1%      | 6.0%      |
| Reported shortness<br>of breath (% yes)                                    | At rest^                           | 6.2%      | 9.0%      |
|                                                                            | Walking on a flat<br>surface^      | 9.2%      | 16.1%     |
|                                                                            | Walking uphill/climbing<br>stairs^ | 27.6%     | 43.6%     |
|                                                                            | Following strenuous<br>activity    | 27.0%     | 29.0%     |

422 Table 1: Sample characteristics of adults with obstructive lung disease

423 Note: Data for continuous variables are presented as mean ± standard deviation. ^p<0.05 for the  
424 chi-square for categorical variables; \*p<0.05 using t-tests

425

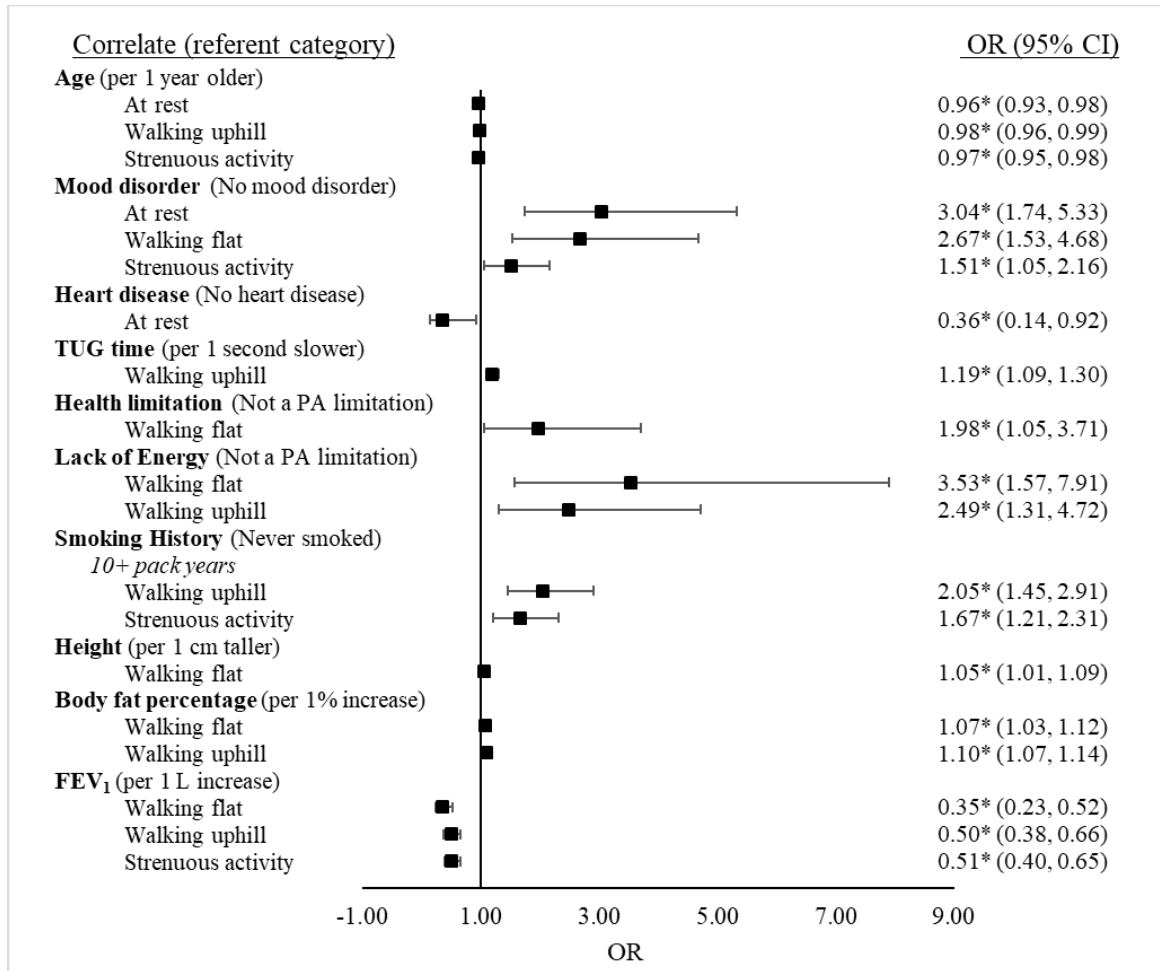

426

427 Figure 1: Significant associations of self-reported resting and exertional dyspnea in the past year  
 428 with sociodemographic, health and health behavioural predictors among males with obstructive  
 429 lung disease (n=1,139)

430

431 Note: A higher OR indicates a higher odds of reporting dyspnea at rest, walking on a flat surface,  
 432 walking uphill/climbing stairs, or following strenuous activity relative to the referent category.

433 \*p<0.05

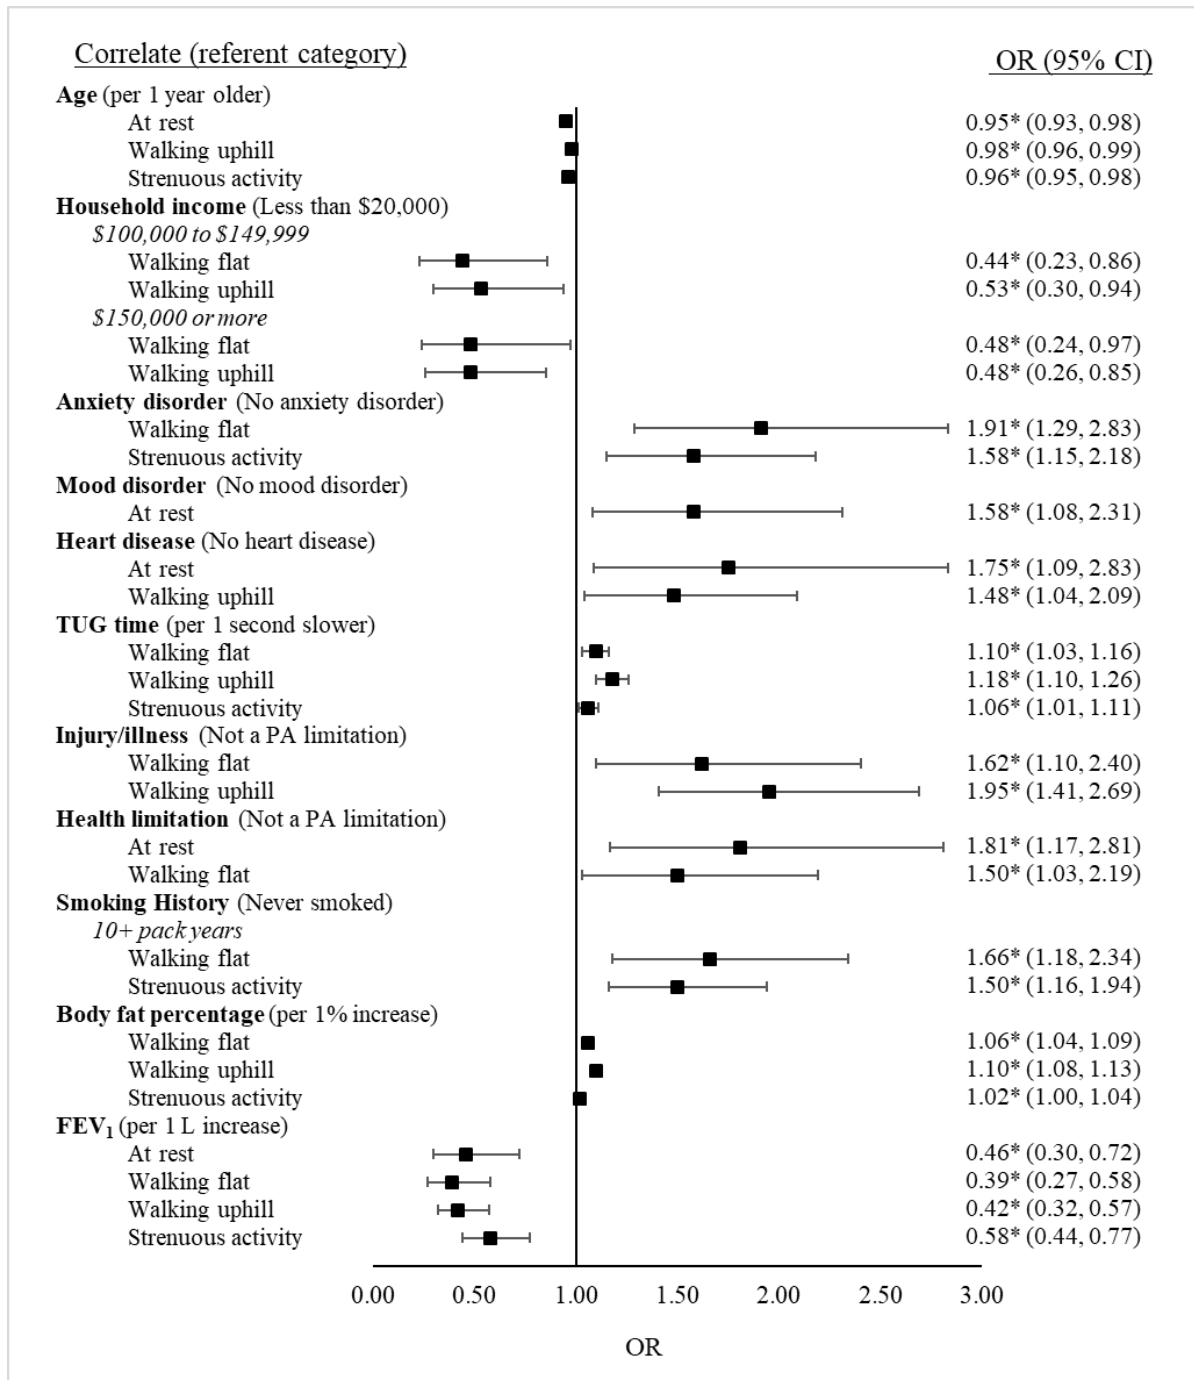

434  
 435  
 436 Figure 2: Significant associations of self-reported resting and exertional dyspnea in the past year  
 437 with sociodemographic, health and health behavioural predictors among females with obstructive  
 438 lung disease (n=1,715)



439 Note: A higher OR indicates a higher odds of reporting dyspnea at rest, walking on a flat surface,  
440 walking uphill/climbing stairs, or following strenuous activity relative to the referent category.

441 \* $p < 0.05$

442

443
